# Supplementary material for: Identification and characterization of the MAPK genes in sorghum and their expression in response to aphid infestation
Source: Research Square preprint supplement (doi:10.21203/rs.3.rs-8413006/v1), 2026-02-24
Supplement: Supplementary file 1 [file fc16c58e04f522bb1e13bcd1.docx]

**Table S1: Nomenclature of MAPKs in Sorghum and comparison with those in Brachypodium and Arabidopsis.**

| Sb gene name | Sb gene ID | Bd gene name | Bd gene ID | At gene name | At gene ID |
| --- | --- | --- | --- | --- | --- |
| SbMAPK1  SbMAPK2  SbMAPK3  SbMAPK4  SbMAPK5  SbMAPK6  SbMAPK7  SbMAPK8  SbMAPK9  SbMAPK10  SbMAPK11  SbMAPK12  SbMAPK13  SbMAPK14  SbMAPK15  SbMAPK16  SbMAPK17  SbMAPK18  SbMAPK19 | Sobic.001G014200  Sobic.001G315700  Sobic.001G410100  Sobic.003G229400  Sobic.003G236000  Sobic.003G248100  Sobic.004G032800  Sobic.004G040200  Sobic.004G270200  Sobic.005G106600  Sobic.007G046100  Sobic.009G038900  Sobic.009G234300  Sobic.009G242200  Sobic.009G246300  Sobic.010G013200  Sobic.010G043200  Sobic.010G249500  Sobic.010G257100 | BdMAPK3  BdMAPK4  BdMAPK6  BdMAPK7-1  BdMAPK7-2  BdMAPK11  BdMAPK14  BdMAPK16  BdMAPK17  BdMAPK20-1  BdMAPK20-2  BdMAPK20-3  BdMAPK20-4  BdMAPK20-5  BdMAPK21-1  BdMAPK21-2 | Bradi1g65810  Bradi3g32000  Bradi1g49100  Bradi1g34030  Bradi4g24912  Bradi3g16560  Bradi3g03780  Bradi2g36470  Bradi1g34700  Bradi2g44350  Bradi2g15317  Bradi1g41780  Bradi2g45870  Bradi2g16337  Bradi2g15620  Bradi2g45010 | AtMAPK1  AtMAPK2  AtMAPK3  AtMAPK4  AtMAPK5  AtMAPK6  AtMAPK7  AtMAPK8  AtMAPK9  AtMAPK10  AtMAPK11  AtMAPK12  AtMAPK13  AtMAPK14  AtMAPK15  AtMAPK16  AtMAPK17  AtMAPK18  AtMAPK19  AtMAPK20 | At1g10210  At1g59580  At3g45640  At4g01370  At4g11330  At2g43790  At2g18170  At1g18150  At3g18040  At3g59790  At1g01560  At2g46070  At1g07880  At4g36450  At1g73670  At5g19010  At2g01450  At1g53510  At3g14720  At2g42880 |

**Table S2:** Nomenclature of MAPKs in Maize, Barley, and Poplar.

| Maize gene name | Maize gene ID | Barley gene name | Barley gene ID | Poplar gene name | Poplar gene ID |
| --- | --- | --- | --- | --- | --- |
| ZmMAPK1  ZmMAPK2  ZmMAPK3-1  ZmMAPK3-1  ZmMAPK3-2  ZmMAPK4  ZmMAPK6-1  ZmMAPK6-2  ZmMAPK8  ZmMAPK12  ZmMAPK15  ZmMAPK16  ZmMAPK17-1  ZmMAPK17-2  ZmMAPK17-3  ZmMAPK18-1  ZmMAPK18-2  ZmMAPK19  ZmMAPK20-1  ZmMAPK20-2 | Zm00001d014658  Zm00001d015269  GRMZM2G053987  Zm00001d047758  Zm00001d028711  Zm00001d047349  Zm00001d036215  Zm00001d045310  Zm00001d011465  Zm00001d024568  Zm00001d039105  Zm00001d024807  Zm00001d053997  Zm00001d036448  Zm00001d014726  Zm00001d043954  Zm00001d011525  Zm00001d009587  Zm00001d039141  Zm00001d011426 | HvMAPK1  HvMAPK2  HvMAPK3  HvMAPK4  HvMAPK5  HvMAPK6  HvMAPK7  HvMAPK8  HvMAPK9  HvMAPK10  HvMAPK11  HvMAPK12  HvMAPK13  HvMAPK14  HvMAPK15  HvMAPK16  HvMAPK17  HvMAPK18  HvMAPK19  HvMAPK20 | HORVU1Hr1g049500.1  HORVU1Hr1g088510.1  HORVU1Hr1g090940.17  HORVU1Hr1g091890.1  HORVU3Hr1g056200.1  HORVU3Hr1g057660.34  HORVU3Hr1g060390.3  HORVU4Hr1g049430.1  HORVU4Hr1g057200.4  HORVU5Hr1g078060.3  HORVU5Hr1g120960.1  HORVU5Hr1g017820.5  HORVU6Hr1g021480.1  HORVU6Hr1g068270.1  HORVU7Hr1g008690.19  HORVU7Hr1g023760.3  HORVU7Hr1g082510.1  HORVU7Hr1g095810.7  HORVU7Hr1g097740.1 | PtMAPK1  PtMAPK2  PtMAPK3-1  PtMAPK3-2  PtMAPK4  PtMAPK5-1  PtMAPK5-2  PtMAPK6-1  PtMAPK6-2  PtMAPK7  PtMAPK9-1  PtMAPK9-2  PtMAPK11  PtMAPK14  PtMAPK16-1  PtMAPK16-2  PtMAPK17  PtMAPK18  PtMAPK19  PtMAPK20-1  PtMAPK20-2 | Potri.002G032100  Potri.005G231100  Potri.009G066100  Potri.001G271700  Potri.014G088500  Potri.001G099900  Potri.003G131800  Potri.007G139800  Potri.017G010200  Potri.005G119500  Potri.012G048600  Potri.015G040300  Potri.002G162500  Potri.007G020100  Potri.008G200800  Potri.010G029700  Potri.010G112200  Potri.011G102500  Potri.001G381300  Potri.005G201800  Potri.002G059900 |

**Table S3: Nine designed primers.**

| Gene ID | Gene name | Primer |
| --- | --- | --- |
| Sobic.001G014200 | SbMAPK1-F | AGGCAAGTTCCTTTCTCTGAAG |
| SbMAPK1-R | CGCGGTGGAAGAATCCATTA |
| Sobic.001G410100 | SbMAPK3-F | CAGAGGATCACAGTTGAAGAGG |
| SbMAPK3-R | GCTCGAAGTCGAACGAGAAT |
| Sobic.003G229400 | SbMAPK4-F | GTCCACACTGGAGAGAAAGTAG |
| SbMAPK4-R | GGAGTCTCAGAAGCTTGATCTC |
| Sobic.003G236000 | SbMAPK5-F | TCGAAGAAAGTGCTGCTAAGG |
| SbMAPK5-R | GTCGTCGCTGCTGTCATTTA |
| Sobic.004G032800 | SbMAPK7-F | TTCCTGGGAGGAATGTTGTG |
| SbMAPK7-R | GGCCTTATCACTGCGAATCT |
| Sobic.004G270200 | SbMAPK9-F | TTGACACTCCATCCTCTCTTTC |
| SbMAPK9-R | CTTGAGGCCAAGATTGTTCATC |
| Sobic.009G234300 | SbMAPK13-F | CGGACTATGTTGCTACCAGATG |
| SbMAPK13-R | CAACCGATGCTCCACATATCA |
| Sobic.009G242200 | SbMAPK14-F | CTCCTTCGAGGAGGGAATTTAG |
| SbMAPK14-R | GTGATGCTCTGC TGTGAGAT |
| Sobic.009G246300 | SbMAPK15-F | TGACTTGACCAAGGAGCATTAC |
| SbMAPK15-R | GCTTCAGGTCACGGTGATAAA |

Table S4. Distribution of the cis elements in the promoter regions (2000bp upstream) of the sorghum MAPK genes

| **Motif name** | **Sorghum MAPK (SbMAPK)** | | | | | | | | | | | | | | | | | | | **Functions** |
| --- | --- | --- | --- | --- | --- | --- | --- | --- | --- | --- | --- | --- | --- | --- | --- | --- | --- | --- | --- | --- |
| 1 | 2 | 3 | 4 | 5 | 6 | 7 | 8 | 9 | 10 | 11 | 12 | 13 | 14 | 15 | 16 | 17 | 18 | 19 |
| ABRE | 6 | 15 | 7 | 6 | 5 | 5 | 10 | 5 | 4 | 6 | 7 | 7 | 6 | 8 | 3 | 2 | 6 | 9 | 11 | Involved in the abscisic acid responsiveness |
| GARE-motif | 1 | 1 | 1 | 0 | 0 | 1 | 1 | 2 | 4 | 0 | 0 | 2 | 2 | 1 | 4 | 0 | 1 | 4 | 1 | Gibberellin- responsive element |
| P-box | 1 | 0 | 0 | 0 | 1 | 1 | 4 | 1 | 3 | 0 | 0 | 3 | 1 | 0 | 0 | 1 | 0 | 0 | 0 | Gibberellin- responsive element |
| TCA-element | 4 | 2 | 2 | 3 | 1 | 0 | 2 | 0 | 1 | 2 | 0 | 3 | 2 | 1 | 3 | 1 | 2 | 1 | 0 | Salicylic acid responsiveness |
| ERE | 1 | 0 | 0 | 0 | 2 | 2 | 1 | 0 | 0 | 1 | 0 | 2 | 1 | 0 | 0 | 2 | 3 | 0 | 0 | ethylene rich motif |
| TGACG-motif | 10 | 10 | 5 | 6 | 4 | 7 | 4 | 5 | 5 | 7 | 4 | 3 | 11 | 4 | 5 | 3 | 11 | 6 | 7 | involved in the MeJA-responsiveness |
| CGTCA-motif | 10 | 10 | 5 | 6 | 4 | 7 | 4 | 5 | 5 | 7 | 4 | 3 | 11 | 4 | 5 | 3 | 11 | 6 | 7 | involved in the MeJA-responsiveness |
| AuxRR-core | 1 | 0 | 0 | 0 | 2 | 0 | 0 | 1 | 0 | 0 | 2 | 0 | 0 | 0 | 0 | 0 | 2 | 0 | 0 | auxin-responsive element |
| TGA-element | 0 | 2 | 2 | 2 | 1 | 0 | 0 | 0 | 0 | 0 | 3 | 1 | 1 | 3 | 1 | 0 | 0 | 1 | 1 | auxin-responsive element |
| W box | 1 | 1 | 3 | 1 | 2 | 2 | 3 | 0 | 3 | 0 | 0 | 2 | 1 | 0 | 3 | 2 | 1 | 0 | 1 | - |
| WRE3 | 5 | 6 | 1 | 2 | 1 | 6 | 3 | 0 | 1 | 6 | 3 | 4 | 5 | 1 | 3 | 2 | 6 | 0 | 4 | - |
| WUN-motif | 1 | 1 | 0 | 1 | 0 | 0 | 1 | 0 | 0 | 0 | 0 | 3 | 0 | 0 | 0 | 3 | 0 | 0 | 3 | Wound related motif |
| TC-rich repeats | 1 | 0 | 0 | 2 | 1 | 0 | 1 | 0 | 0 | 0 | 1 | 1 | 0 | 0 | 0 | 2 | 1 | 0 | 3 | involved in defense and stress |
| CCAAT-box | 3 | 4 | 1 | 2 | 1 | 1 | 1 | 1 | 2 | 0 | 1 | 1 | 2 | 0 | 2 | 1 | 0 | 3 | 1 | Stress and defense  inducible element |
| ARE | 4 | 3 | 1 | 1 | 2 | 3 | 6 | 2 | 5 | 6 | 3 | 10 | 3 | 4 | 5 | 5 | 1 | 4 | 0 | - |
| AAGAA-motif | 0 | 1 | 1 | 6 | 1 | 2 | 5 | 0 | 1 | 1 | 1 | 2 | 3 | 4 | 7 | 1 | 3 | 0 | 3 | - |
| as-1 | 10 | 10 | 5 | 6 | 4 | 7 | 4 | 5 | 5 | 7 | 4 | 3 | 11 | 4 | 5 | 1 | 11 | 6 | 7 | - |
| DRE1 | 1 | 0 | 0 | 1 | 0 | 0 | 1 | 1 | 1 | 1 | 0 | 0 | 0 | 1 | 0 | 0 | 1 | 0 | 0 | - |
| LTR | 4 | 0 | 3 | 1 | 1 | 5 | 2 | 3 | 1 | 1 | 4 | 0 | 0 | 0 | 1 | 3 | 1 | 1 | 2 | Involved in low temperature responsiveness |
| STRE | 10 | 12 | 9 | 11 | 5 | 6 | 9 | 15 | 7 | 9 | 5 | 11 | 11 | 5 | 6 | 5 | 4 | 11 | 14 | - |
| MBS | 4 | 6 | 3 | 3 | 4 | 5 | 4 | 1 | 4 | 3 | 3 | 5 | 2 | 6 | 0 | 5 | 1 | 1 | 3 | Drought inducible |
| MYB | 10 | 8 | 9 | 11 | 4 | 10 | 9 | 8 | 10 | 11 | 7 | 9 | 8 | 15 | 11 | 7 | 3 | 8 | 6 | - |
| MYC | 12 | 3 | 6 | 8 | 7 | 10 | 21 | 6 | 7 | 11 | 9 | 11 | 10 | 7 | 8 | 6 | 13 | 9 | 3 | - |
| Myb | 4 | 8 | 4 | 6 | 11 | 8 | 5 | 1 | 4 | 5 | 5 | 7 | 4 | 9 | 4 | 6 | 2 | 2 | 5 | Drought inducible |
| AAGAA-motif | 0 | 1 | 1 | 6 | 1 | 2 | 5 | 0 | 1 | 1 | 1 | 2 | 3 | 4 | 7 | 1 | 3 | 0 | 3 | - |
| Box 4 | 3 | 1 | 1 | 0 | 3 | 1 | 2 | 0 | 2 | 4 | 0 | 2 | 0 | 1 | 2 | 3 | 2 | 0 | 1 | involved in light responsiveness |
| CCGTCC motif | 4 | 2 | 6 | 3 | 2 | 3 | 0 | 3 | 2 | 3 | 3 | 4 | 2 | 2 | 6 | 0 | 2 | 7 | 2 | - |
| CCGTCC-box | 4 | 2 | 6 | 0 | 2 | 3 | 0 | 3 | 2 | 3 | 3 | 4 | 2 | 2 | 6 | 0 | 2 | 7 | 2 | - |
| DRE core | 1 | 7 | 6 | 0 | 2 | 1 | 1 | 1 | 1 | 2 | 3 | 2 | 1 | 1 | 3 | 3 | 3 | 3 | 5 | - |
| CCAAT-box | 3 | 4 | 1 | 2 | 1 | 1 | 1 | 1 | 2 | 0 | 1 | 1 | 2 | 0 | 2 | 1 | 0 | 3 | 1 | MYBHv1 binding site |
| G-box | 4 | 17 | 9 | 4 | 5 | 4 | 5 | 1 | 1 | 4 | 3 | 8 | 5 | 4 | 3 |  | 4 | 6 | 8 | involved in light responsiveness |

Table S5: Subcellular location and UTR position of the sorghum MAPK genes

| **Gene ID** | **Gene name** | **5' UTR** | **3' UTR** | **Subcellular location** |
| --- | --- | --- | --- | --- |
| **Sobic.001G014200** | SbMAPK1 | 480 | 404 | cyto: 10, chlo: 1, nucl: 1, plas: 1, cysk: 1 |
| **Sobic.001G315700** | SbMAPK2 | 208 | 1068 | chlo: 6, nucl: 5, cyto: 1, plas: 1, cysk: 1 |
| **Sobic.001G410100** | SbMAPK3 | 278 | 283 | cyto: 7, cysk: 4, nucl: 3 |
| **Sobic.003G229400** | SbMAPK4 | 478 | 953 | cyto: 8, nucl: 3, pero: 2, plas: 1 |
| **Sobic.003G236000** | SbMAPK5 | 908 | 327 | cyto: 8, nucl: 2, chlo: 1, mito: 1, pero: 1, cysk: 1 |
| **Sobic.003G248100** | SbMAPK6 | 91 | 599 | cyto: 8, chlo: 2, mito: 2, nucl: 1, cysk: 1 |
| **Sobic.004G032800** | SbMAPK7 | 3616 | 308 | nucl: 6, chlo: 3, cyto: 3, pero: 1, golg: 1 |
| **Sobic.004G040200** | SbMAPK8 | 825 | 333 | cyto: 8, nucl: 2, cysk: 2, mito: 1, golg: 1 |
| **Sobic.004G270200** | SbMAPK9 | 162 | 484 | nucl: 12, chlo: 1, cyto: 1 |
| **Sobic.005G106600** | SbMAPK10 | 1304 | 402 | cyto: 6, chlo: 3, nucl: 3, cysk: 2 |
| **Sobic.007G046100** | SbMAPK11 | 403 | 416 | chlo: 8, nucl: 1, cyto: 1, vacu: 1, E.R.: 1, pero: 1, cysk: 1 |
| **Sobic.009G038900** | SbMAPK12 | 525 | 901 | cyto: 7, nucl: 5, plas: 1, pero: 1 |
| **Sobic.009G234300** | SbMAPK13 | 176 | 520 | cyto: 6, cysk: 5, nucl: 3 |
| **Sobic.009G242200** | SbMAPK14 | 191 | 381 | chlo: 7, mito: 4.5, cyto_mito: 3, nucl: 2 |
| **Sobic.009G246300** | SbMAPK15 | 842 | 203 | cyto: 7, nucl: 5, vacu: 1, pero: 1 |
| **Sobic.010G013200** | SbMAPK16 | 931 | 376 | nucl: 9, chlo: 2, cyto: 2, cysk: 1 |
| **Sobic.010G043200** | SbMAPK17 | 119 | 1001 | nucl: 5, cyto: 4, cysk: 4, extr: 1 |
| **Sobic.010G249500** | SbMAPK18 | 309 | 689 | cyto: 8, nucl: 3, cysk: 2, golg: 1 |
| **Sobic.010G257100** | SbMAPK19 | 349 | 540 | cyto: 6, nucl: 3, chlo: 2, cysk: 2, mito: 1 |

Table S6: the sorghum MAPK genes protein structure summary

| **Groups** | **Gene name** | **Template** | **Simlarity** | **GMQE** | **QMEANDisCo Global** | **Description** |
| --- | --- | --- | --- | --- | --- | --- |
| Group A | SbMAPK3 | [6dtl.1.A](https://swissmodel.expasy.org/templates/6dtl.1) | 74.17% | 0.82 | 0.82 ± 0.05 | Mitogen-activated protein kinase 6 |
| SbMAPK17 | [6dtl.1.A](https://swissmodel.expasy.org/templates/6dtl.1) | 89.47% | 0.82 | 0.82 ± 0.05 | Mitogen-activated protein kinase 6 |
| Group B | SbMPK2 | [7w5c.1.A](https://swissmodel.expasy.org/templates/7w5c.1) | 83.10% | 0.84 | 0.84 ± 0.05 | Mitogen-activated protein kinase 4 |
| SbMPK11 | [7w5c.1.A](https://swissmodel.expasy.org/templates/7w5c.1) | 81.97% | 0.84 | 0.84 ± 0.05 | Mitogen-activated protein kinase 4 |
| Group C | SbMPK8 | [6dtl.1.A](https://swissmodel.expasy.org/templates/6dtl.1) | 59.36% | 0.78 | 0.78 ± 0.05 | Mitogen-activated protein kinase 6 |
| SbMPK18 | [6dtl.1.A](https://swissmodel.expasy.org/templates/6dtl.1) | 58.60% | 0.78 | 0.78 ± 0.05 | Mitogen-activated protein kinase 6 |
| SbMPK9 | [2iw8.1.A](https://swissmodel.expasy.org/templates/2iw8.1) | 39.72% | 0.47 | 0.70 ± 0.05 | Cell division protein kinase 2 |
| SbMPK16 | [9gla.1.A](https://swissmodel.expasy.org/templates/9gla.1) | 41.72% | 0.45 | 0.70 ± 0.05 | Cyclin-dependent kinase 2 |
| Group D | SbMPK10 | [6dtl.1.A](https://swissmodel.expasy.org/templates/6dtl.1) | 47.95% | 0.51 | 0.72 ± 0.05 | Mitogen-activated protein kinase 1 |
| SbMPK12 | [5o7i.1.A](https://swissmodel.expasy.org/templates/5o7i.1) | 50.44% | 0.45 | 0.73 ± 0.05 | Mitogen-activated protein kinase 7 |
| SbMPK7 | [5o7i.1.A](https://swissmodel.expasy.org/templates/5o7i.1) | 47.67% | 0.57 | 0.73 ± 0.05 | Mitogen-activated protein kinase 7 |
| SbMPK19 | [5o7i.1.A](https://swissmodel.expasy.org/templates/5o7i.1) | 47.65% | 0.46 | 0.72 ± 0.05 | Mitogen-activated protein kinase 7 |
| SbMPK5 | [5o7i.1.A](https://swissmodel.expasy.org/templates/5o7i.1) | 47.38% | 0.56 | 0.73 ± 0.05 | Mitogen-activated protein kinase 7 |
| SbMPK14 | [4ic7.1.A](https://swissmodel.expasy.org/templates/4ic7.1) | 46.32% | 0.44 | 0.65 ± 0.05 | Mitogen-activated protein kinase 7 |
| SbMPK4 | [5o7i.1.A](https://swissmodel.expasy.org/templates/5o7i.1) | 46.32% | 0.42 | 0.73 ± 0.05 | Mitogen-activated protein kinase 7 |
| SbMPK15 | [6dtl.1.A](https://swissmodel.expasy.org/templates/6dtl.1) | 47.08% | 0.42 | 0.72 ± 0.05 | Mitogen-activated protein kinase 1 |
| SbMPK6 | [4qtb.1.A](https://swissmodel.expasy.org/templates/4qtb.1) | 45.30% | 0.44 | 0.72 ± 0.05 | Mitogen-activated protein kinase 3 |
| SbMPK13 | [8rlx.1.A](https://swissmodel.expasy.org/templates/8rlx.1) | 45.38% | 0.43 | 0.72 ± 0.05 | Mitogen-activated protein kinase 1 |
| SbMPK1 | 5o7i.1.A | 47.66% | 0.46 | 0.73 ± 0.05 | Mitogen-activated protein kinase 7 |
